# Supplementary material for: Reversing immunosuppression in the tumor microenvironment of fibrolamellar carcinoma via PD-1 and IL-10 blockade
Source: PubMed Central journal article supplement (PMC10907637; doi:10.1038/s41598-024-55593-6), 2024-03-01
Supplement: 41598_2024_55593_MOESM1_ESM.pdf [file 41598_2024_55593_MOESM1_ESM.pdf]

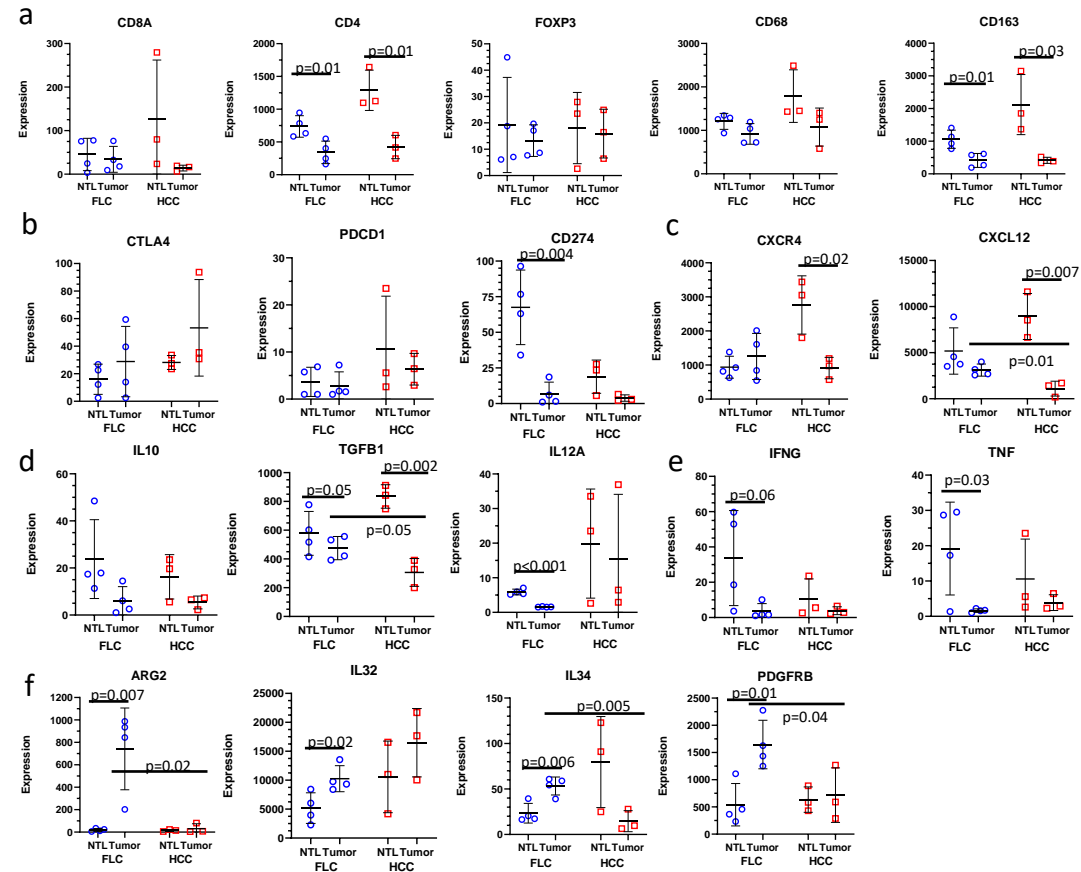

## Supplementary figure S1.

Individual RNA expression counts for (a) immune cell type markers, (b) checkpoint inhibition markers, (c) chemokine and chemokine receptors, (d) anti-inflammatory cytokines, (e) pro-inflammatory cytokines, and (f) genes upregulated in FLC tumor

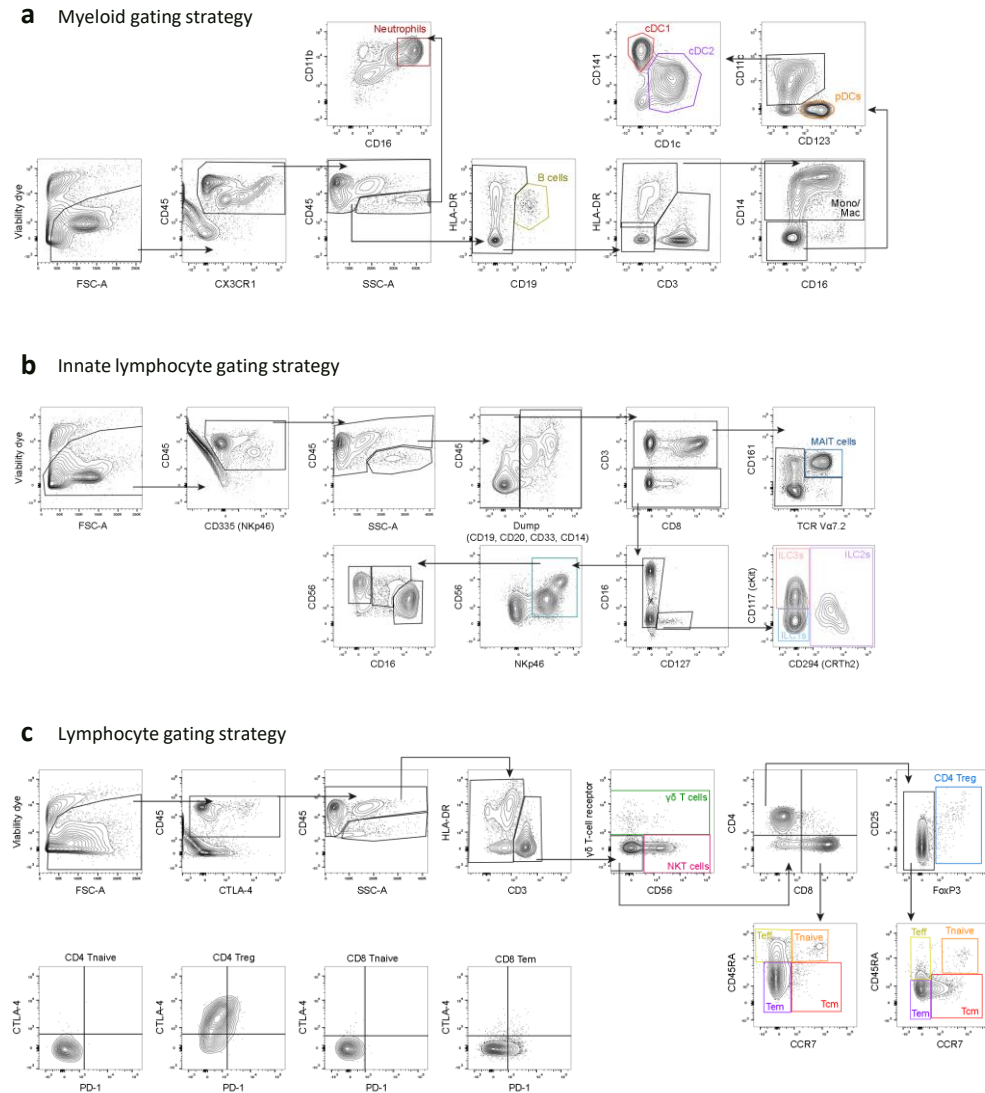

## Supplementary figure S2.

Representative flow cytometric gating strategy to define tumor-infiltrating myeloid (a), innate lymphocytes (b) and lymphocyte (c) populations in FLC and NTL.

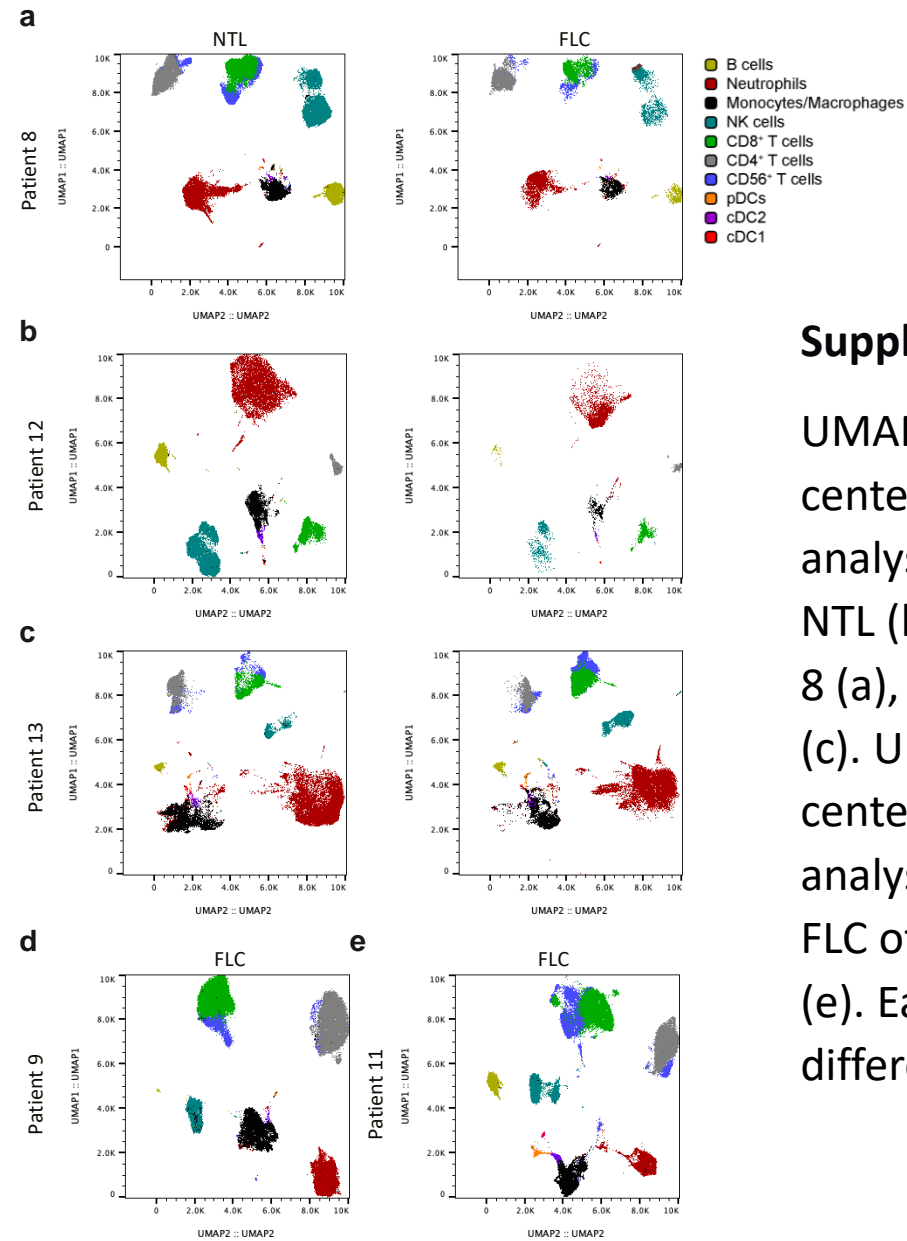

### Supplementary figure S3.

UMAPs displaying myeloid-centered panel flow cytometry analysis of live CD45<sup>+</sup> cells from NTL (left) and FLC (right) of patient 8 (a), patient 12 (b) and patient 13 (c). UMAPs displaying myeloid-centered panel flow cytometry analysis of live CD45<sup>+</sup> cells from FLC of patient 9 (d) and patient 11 (e). Each color represents a different immune population.

a

|                                            | Productive Clonality | Carcinoma CD8 <sup>+</sup> mm <sup>2</sup> | Carcinoma CD4 <sup>+</sup> mm <sup>2</sup> | Carcinoma Treg mm <sup>2</sup> | Carcinoma Macrophage mm <sup>2</sup> |
|--------------------------------------------|----------------------|--------------------------------------------|--------------------------------------------|--------------------------------|--------------------------------------|
| Productive Clonality                       |                      | -0.873                                     | -0.998                                     | -0.977                         | -0.559                               |
| Carcinoma CD8 <sup>+</sup> mm <sup>2</sup> | -0.873               |                                            | 0.737                                      | 0.143                          | -0.392                               |
| Carcinoma CD4 <sup>+</sup> mm <sup>2</sup> | -0.998               | 0.737                                      |                                            | 0.675                          | 0.314                                |
| Carcinoma Treg mm <sup>2</sup>             | -0.977               | 0.143                                      | 0.675                                      |                                | 0.579                                |
| Carcinoma Macrophage mm <sup>2</sup>       | -0.559               | -0.392                                     | 0.314                                      | 0.579                          |                                      |

b

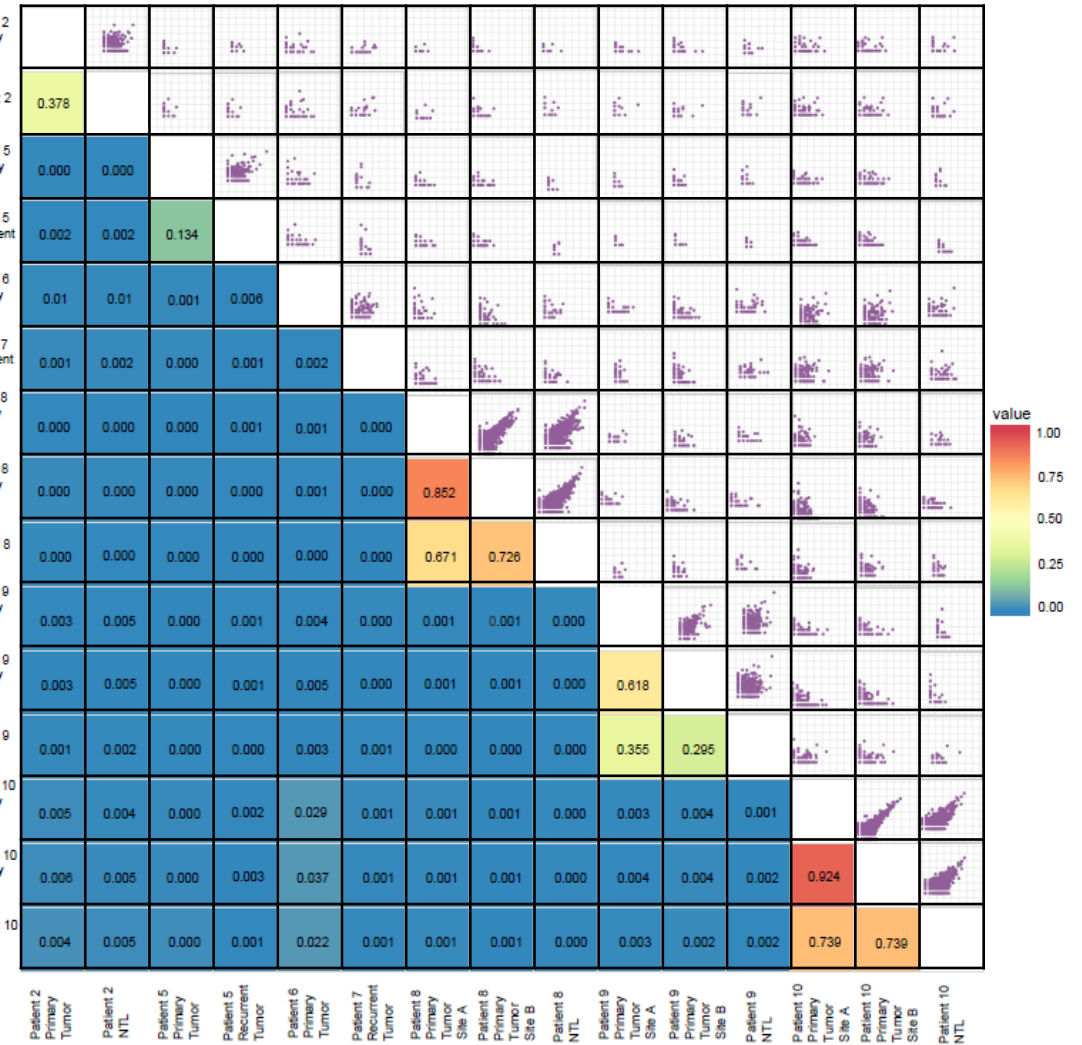

c

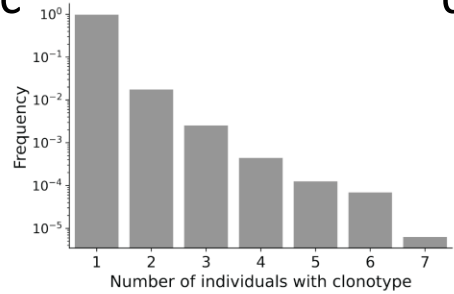

d

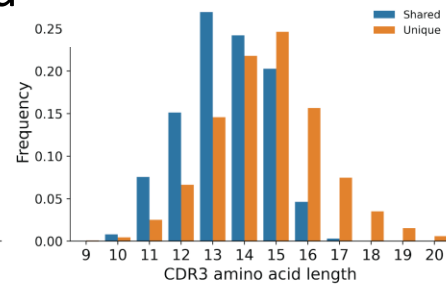

e

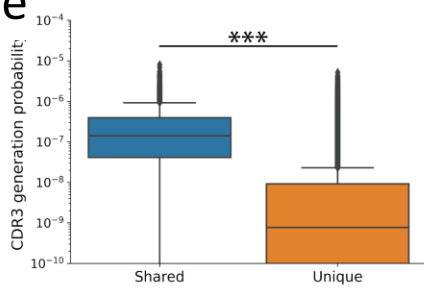

f

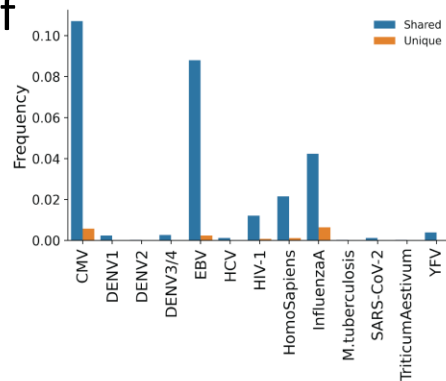

### Supplementary figure S4.

(a) Correlation matrix comparing productive T cell clonality in the tumor as well as CD8<sup>+</sup> T cell, CD4<sup>+</sup> T cell, Regulatory T cell, and macrophage densities in the carcinoma compartment of FLC tumors

(b) Overlap of TCR amino acid sequences for FLC tumor and NTL samples displayed as an Morisita's overlap index (MOI) heat map and scatterplot matrix

(c) Distribution showing the frequency of T cell receptor CDR3 $\beta$  amino acid sequence clonotypes across individuals. (d) Distribution of CDR3 amino acid lengths demonstrates that clonotypes shared across at least two individuals are considerably shorter than those found in only a single individual ( $p < 0.001$  by Mann-Whitney U test). (e) Shared TCR sequences had significantly higher generation probabilities ( $***p < 0.001$  by Mann-Whitney U test) as calculated by OLGA<sup>7</sup> (f) Shared TCR sequences were significantly more likely to have been previously found to recognize common viral epitopes in VDJD<sup>8</sup>. CMV- cytomegalovirus, DENV- Dengue virus, EBV- Epstein-Barr virus, HCV- Hepatitis C virus, HIV- human immunodeficiency virus, YFV- Yellow fever virus.

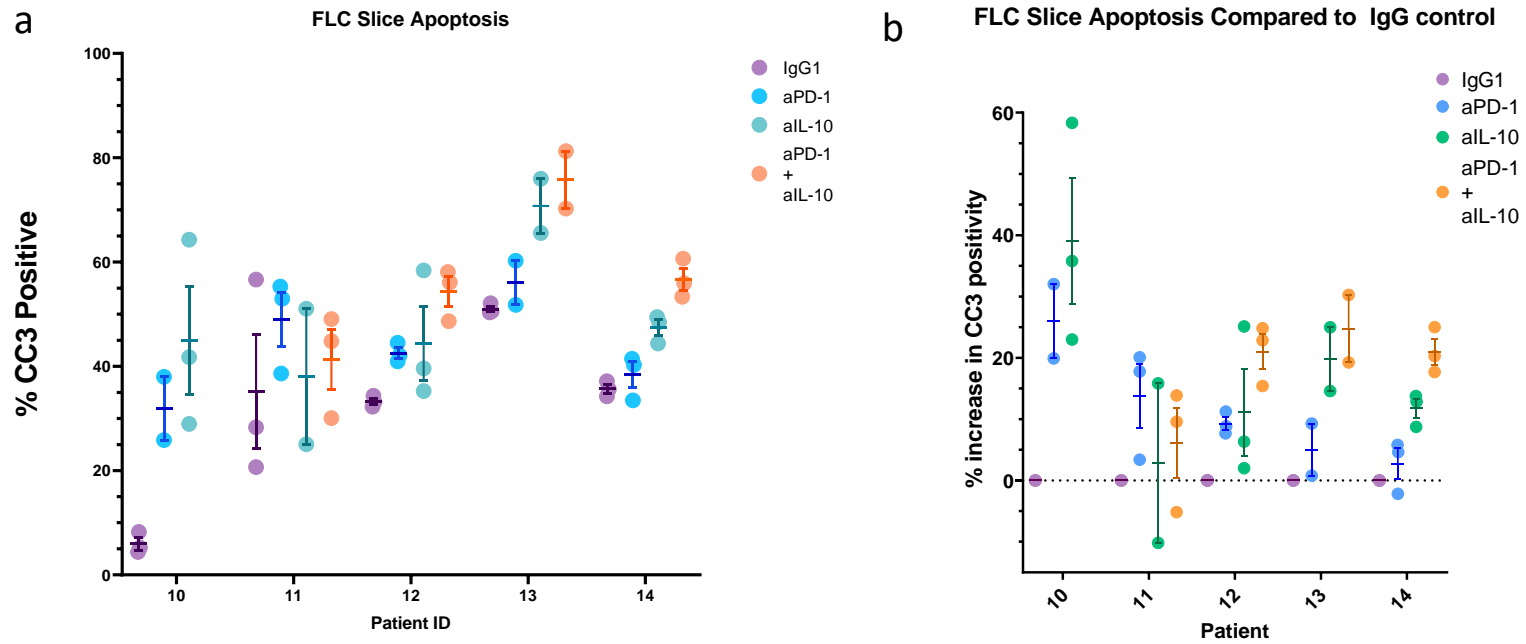

**Supplementary figure S5.**

Cleaved caspase 3 (cC3) after different treatment groups for individual patients with (a) percentage absolute values and (b) percentage increased using IgG control as baseline of zero

| <b>Position</b> | <b>Antibody</b> | <b>Clone / Host</b> | <b>Company / Item</b>    | <b>Concentration</b> | <b>OPAL (1:100)</b> |
|-----------------|-----------------|---------------------|--------------------------|----------------------|---------------------|
| 1               | CK18            | EP30 / Rabbit       | Bio SB / BSB 6698        | 0.5 ug/ml            | 520                 |
| 2               | CD8             | 144B / Mouse        | DAKO / M7103             | 0.05 ug/ml           | 540                 |
| 3               | CD68            | PG-M1 / Mouse       | DAKO / M0876             | 0.04 ug/ml           | 570                 |
| 4               | HLA-DR          | EP96 / Rabbit       | Bio SB / BSB 6797        | 0.13 ug/ml           | 620                 |
| 5               | CD4             | EP204 / Rabbit      | Epitomics / AC0173A      | 0.08 ug/ml           | 690                 |
| 6               | FoxP3           | 236A/E7 / Mouse     | eBioscience / 14-4777-82 | 5 ug/ml              | 650                 |

### **Supplemental Table 1**

Multiplex immunohistochemistry (mIHC) primary antibodies

| Marker         | Fluorophore  | Clone      | Vendor                            | Catalog #  | Host species | Species Reactivity |
|----------------|--------------|------------|-----------------------------------|------------|--------------|--------------------|
| CX3CR1         | BV421        | 2A9-1      | BD Biosciences                    | 565800     | Rat          | Human              |
| CD16           | BUV496       | 3G8        | BD Biosciences                    | 612944     | Mouse        | Human              |
| CD1c           | AF647        | F10/21A3   | BD Biosciences                    | 565048     | Mouse        | Human              |
| CD11c          | AF700        | B-ly6      | BD Biosciences                    | 561352     | Mouse        | Human              |
| CD123          | BV786        | 7G3        | BD Biosciences                    | 564196     | Mouse        | Human              |
| CD4            | PE-Cy7       | SK3        | BD Biosciences                    | 557852     | Mouse        | Human              |
| CD141          | BV605        | 1A4        | BD Biosciences                    | 740421     | Mouse        | Human              |
| HLA-DR         | APC-H7       | G46-6      | BD Biosciences                    | 561358     | Mouse        | Human              |
| CD3            | BUV661       | UCHT1      | BD Biosciences                    | 612964     | Mouse        | Human              |
| CD45           | BUV805       | HI30       | BD Biosciences                    | 612891     | Mouse        | Human              |
| CD11b          | BV750        | ICRF44     | BD Biosciences                    | 747357     | Mouse        | Human              |
| CD14           | BV711        | MφP9       | BD Biosciences                    | 563372     | Mouse        | Human              |
| CD45           | BUV563       | HI30       | BD Biosciences                    | 748720     | Mouse        | Human              |
| CD294 (CRTH2)  | PE-CF594     | BM16       | BD Biosciences                    | 563501     | Rat          | Human              |
| CD16           | BUV395       | 3G8        | BD Biosciences                    | 563785     | Mouse        | Human              |
| CD3            | BUV496       | UCHT1      | BD Biosciences                    | 612940     | Mouse        | Human              |
| CD14           | PerCP-Cy 5.5 | MφP9       | BD Biosciences                    | 562692     | Mouse        | Human              |
| HLA-DR         | BUV661       | G46-6      | BD Biosciences                    | 612980     | Mouse        | Human              |
| CD25           | BUV563       | 2A3        | BD Biosciences                    | 612918     | Mouse        | Human              |
| CD4            | BUV496       | SK3        | BD Biosciences                    | 612936     | Mouse        | Human              |
| CD279 (PD-1)   | BV786        | EH12.1     | BD Biosciences                    | 563789     | Mouse        | Human              |
| CD3            | APC-H7       | SK7        | BD Biosciences                    | 560176     | Mouse        | Human              |
| CD8            | BB660        | RPA-T8     | BD Horizon™ Customs               |            | Mouse        | Human              |
| CD127          | BB790        | HIL-7R-M21 | BD Horizon™ Customs               |            | Mouse        | Human              |
| TCR γδ         | PE-Cy5       | B1         | BD Horizon™ Customs               |            | Mouse        | Human              |
| CD56           | BB790        | NCAM16.2   | BD Horizon™ Customs               |            | Mouse        | Human              |
| CD161          | APC-Fire 750 | HP-3G10    | Biolegend                         | 339944     | Mouse        | Human              |
| CD197 (CCR7)   | PE           | G043H7     | Biolegend                         | 353204     | Mouse        | Human              |
| CD45RA         | BV570        | HI100      | Biolegend                         | 304132     | Mouse        | Human              |
| CD20           | PerCP-Cy 5.5 | 2H7        | Biolegend                         | 302326     | Mouse        | Human              |
| TCR Va7.2      | BV785        | 3C10       | Biolegend                         | 351722     | Mouse        | Human              |
| CD19           | PerCP-Cy 5.5 | SJ25C1     | Biolegend                         | 363016     | Mouse        | Human              |
| CD335 (NKp46)  | Biotin       | 9E2        | Biolegend                         | 331906     | Mouse        | Human              |
| CD33           | PerCP-Cy 5.5 | WM53       | Biolegend                         | 303414     | Mouse        | Human              |
| CD8a           | BV605        | RPA-T8     | Biolegend                         | 301040     | Mouse        | Human              |
| CD152 (CTLA-4) | BV421        | BNI3       | Biolegend                         | 369606     | Mouse        | Human              |
| Streptavidin   | PE           |            | Biolegend                         | 405204     |              |                    |
| CD19           | PE-Cy5.5     | SJ25C1     | Invitrogen (ThermoFisher Science) | 35-0198-42 | Mouse        | Human              |
| FoxP3          | PE-Cy5.5     | PCH101     | Invitrogen (ThermoFisher Science) | 35-4776-42 | Rat          | Human              |
| CD117 (cKit)   | PE-Cy5.5     | 104D2      | Invitrogen (ThermoFisher Science) | CD11718    | Mouse        | Human              |

**Supplemental Table 2**  
Flow cytometry antibodies
